# Supplementary material for: Identification of anti-severe acute respiratory syndrome-related coronavirus 2 (SARS-CoV-2) oxysterol derivatives in vitro
Source: bioRxiv or medRxiv preprint supplement (doi:10.1101/2021.01.31.429001), 2021-02-01
Supplement: Supplementary file [file media-1.pdf]

## **Identification of anti-severe acute respiratory syndrome-related coronavirus 2 (SARS-CoV-2) oxysterol derivatives in vitro**

**Hirofumi Ohashi<sup>1,2</sup>, Feng Wang<sup>3</sup>, Frank Stappenbeck<sup>3</sup>, Kana Tsuchimoto<sup>1</sup>, Chisa Kobayashi<sup>1,2</sup>, Wakana Saso<sup>1,4,5</sup>, Michiyo Kataoka<sup>6</sup>, Kouji Kuramochi<sup>2</sup>, Masamichi Muramatsu<sup>1</sup>, Tadaki Suzuki<sup>6</sup>, Camille Sureau<sup>7</sup>, Makoto Takeda<sup>8</sup>, Takaji Wakita<sup>1</sup>, Farhad Parhami<sup>3\*</sup>, and Koichi Watashi<sup>1,2,9,10\*</sup>**

<sup>1</sup>Department of Virology II, National Institute of Infectious Diseases, Tokyo 162-8640, Japan;  
kwatashi@nih.go.jp

<sup>2</sup>Department of Applied Biological Sciences, Tokyo University of Science, Noda 278-8510, Japan,

<sup>3</sup>MAX BioPharma, Inc., 2870 Colorado Avenue, Santa Monica, CA 90404, USA;

fparhami@maxbiopharma.com

<sup>4</sup>The Institute of Medical Science, The University of Tokyo, Tokyo 108-8639, Japan,

<sup>5</sup>AIDS Research Center, National Institute of Infectious Diseases, Tokyo 162-8640, Japan,

<sup>6</sup>Department of Pathology, National Institute of Infectious Diseases, Tokyo 162-8640, Japan,

<sup>7</sup>Laboratoire de Virologie Moléculaire, Institut National de la Transfusion Sanguine, Paris 75739, France,

<sup>8</sup>Department of Virology III, National Institute of Infectious Diseases, Tokyo 208-0011, Japan,

<sup>9</sup>Institute for Frontier Life and Medical Sciences, Kyoto University, Kyoto 606-8507, Japan,

<sup>10</sup>MIRAI, JST, Saitama 332-0012, Japan,

\* Correspondence: e-mail@e-mail.com; Tel.: fparhami@maxbiopharma.com; +01-424-581-6025 (F. P),  
kwatashi@nih.go.jp; +81-3-5285-1111 (K. W)

Received: date; Accepted: date; Published: date

**Supplementary Figure S1**

**Supplementary Table S1**

Supplementary Figure S1.

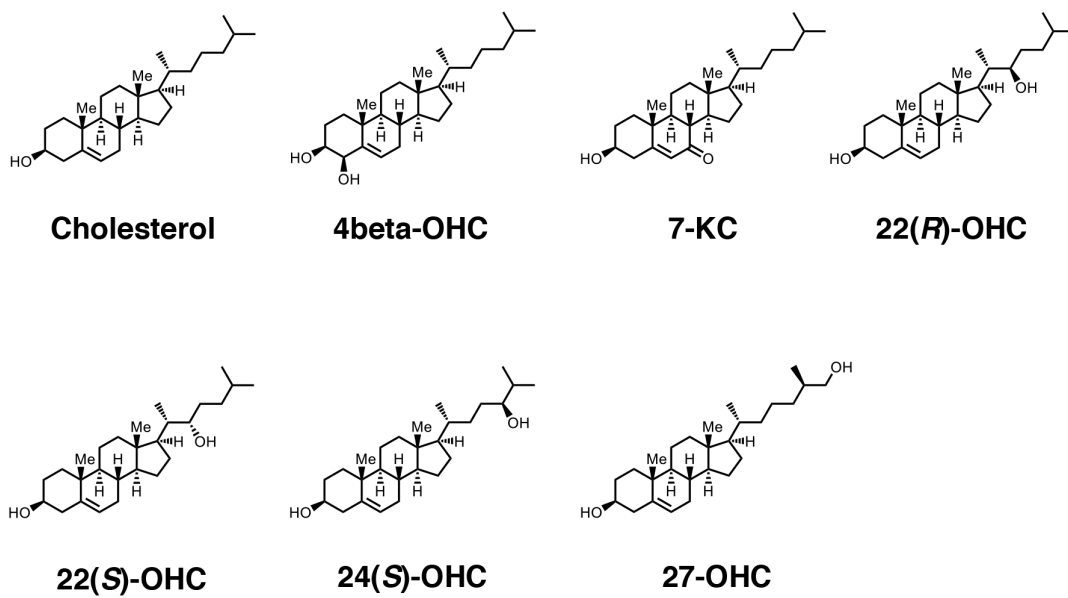

Supplementary Figure S1.

Chemical structure of the natural oxysterols used in this study.

**Supplementary Table S1.**

| <b>(A) Plasma concentrations of Oxy210</b> |                              |     |      |      |     |             |
|--------------------------------------------|------------------------------|-----|------|------|-----|-------------|
| Time (h)                                   | Sample concentration (ng/mL) |     |      |      |     | Mean ± SD   |
| 24                                         | 26                           | 267 | 8    | 12   | 83  | 79 ± 109    |
| 48                                         | 1039                         | 652 | 1218 | 764  | 622 | 859 ± 259   |
| 96                                         | 1157                         | 771 | 4471 | 6050 | 959 | 2682 ± 2423 |

  

| <b>(B) Liver concentrations of Oxy210</b> |                             |      |      |       |      |             |
|-------------------------------------------|-----------------------------|------|------|-------|------|-------------|
| Time (h)                                  | Sample concentration (ng/g) |      |      |       |      | Mean ± SD   |
| 96                                        | 5227                        | 3470 | 7302 | 13291 | 5055 | 6869 ± 1717 |

  

| <b>(C) Lung concentrations of Oxy210</b> |                             |      |      |       |      |             |
|------------------------------------------|-----------------------------|------|------|-------|------|-------------|
| Time (h)                                 | Sample concentration (ng/g) |      |      |       |      | Mean ± SD   |
| 96                                       | 1688                        | 1109 | 6083 | 10524 | 1282 | 4137 ± 1843 |

**Supplementary Table S1. Concentration of Oxy210 in plasma, liver, and lung in mice.** Oxy210 mixed in regular Chow food at 4 mg/g of chow was fed to male C57BL/6 mice ad libitum. (A) Blood was drawn after 24 h, 48 h and 96h to analyze the plasma concentration of Oxy210. After 96 h, terminal liver (B) and lung (C) tissue samples were analyzed for Oxy210 concentrations. The data show the concentrations of Oxy210 in each tissue in five mice and its mean values and SD.
